# Supplementary material
Source: MDPI journal article supplement (https://www.mdpi.com/2073-4344/10/6/703)
Supplement: s1 [file s1]

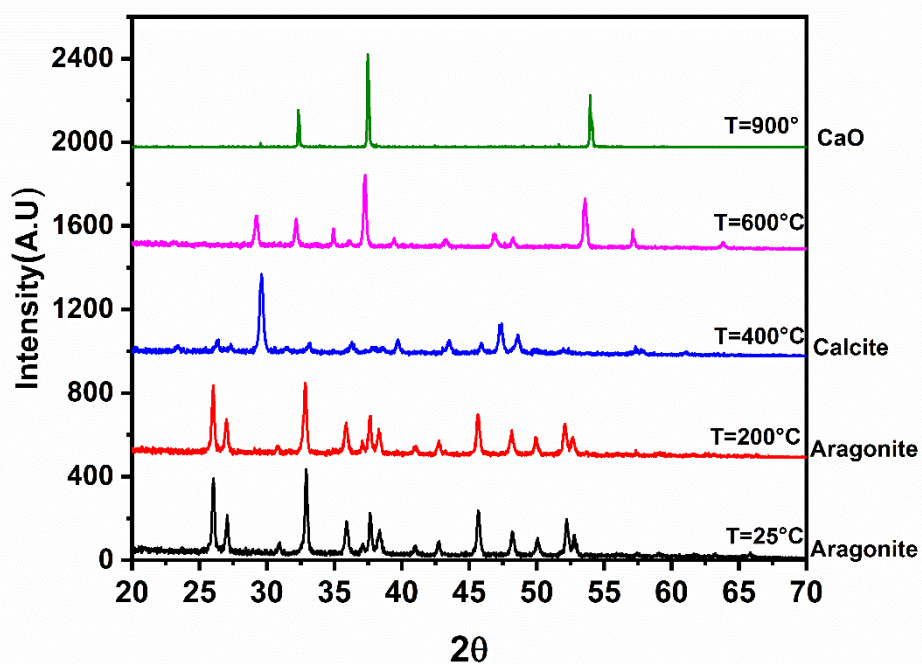

**Figure S1.** XRD patterns of the natural GRS as received and after calcination at different temperatures.

At ambient temperature, the starting material is in the form of aragonite phase, a variety of  $\text{CaCO}_3$ , (JCPDS N°00-005-0453). This variety is stable up to  $200^\circ\text{C}$  and then turns into calcite, another type of  $\text{CaCO}_3$  mineral form (JCPDS N°01-086-2339). At  $600^\circ\text{C}$ , calcite starts decomposes into CaO. The spectrum registered after calcination at  $900^\circ\text{C}$  contains only CaO signals (JCPDS N°00-02-0968).

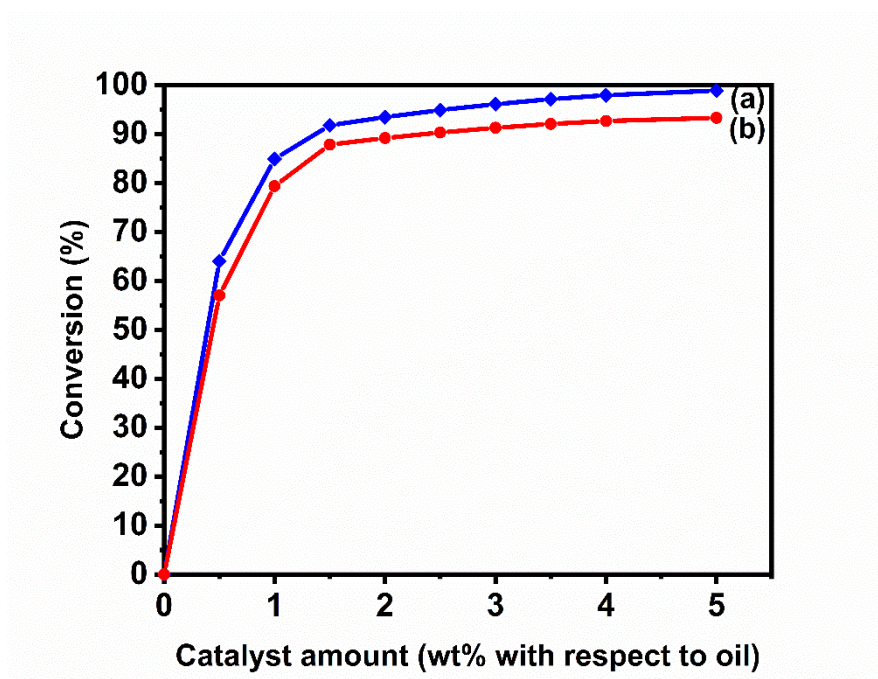

**Figure S2.** Effect of catalyst amount (wt% with respect to oil mass) at fixed molar ratio methanol/oil of 15:1, reaction temperature 65 °C, reaction time 3h for (a) refined oil and (b) waste oil.
